# Supplementary material for: Opioids modulate an emergent rhythmogenic process to depress breathing
Source: eLife. 2019 Dec 16;8:e50613. doi: 10.7554/eLife.50613 (PMC6938398; doi:10.7554/eLife.50613)
Supplement: Source data 1. [file elife-50613-data1.xlsx]

## Sheet: Figure 1
Figure 1C					Figure 1E				Figure 1F				Figure 1I
	9/1.5	10 nM DAMGO	30 nM DAMGO			9/1.5	100 uM picrotoxin, 1 uM strychnine, 30 nM DAMGO			9/1.5	100 uM picrotoxin, 1 uM strychnine, 30 nM DAMGO			9/1.5	10 nM DAMGO	30 nM DAMGO
burstlet fraction	0.306667	0.107143	0		preBötC amp	0.608412	0.628918		burstlet fraction	0.40411	0.181818		burstlet fraction	0.627119	0.846154	0.75
	0.0810811	0.0277778	0			0.646023	1.11106			0.121495	0.142857			0.541176	0.47619	0.545455
	0.047619	0	0.0384615			0.618527	0.470951			0.0581395	0			0.114286	0.0434783	0.272727
	0.327586	0.345455	0.473684			0.699639	1.19808			0.294737	0.0625			0.480519		0.181818
	0.0714286	0	0.0526316			0.729712	1.1234			0.153846	0.111111			0.936364	0.932432	0.833333
	0.0681818	0.037037	0.0588235			0.61963	0.645296			0.0204082	0			0.75		0.666667
						0.624929	0.648443			0.0714286	0.0833333			0.643678	0.773333	0.666667
average	0.150427	0.0862354	0.103933			0.650745	1.58512			0.422619	0.142857
std dev	0.129753	0.132923	0.182906			0.673718	1.92102			0	0		average	0.584735	0.614318	0.559524
						0.642701	0.993523			0.0454545	0.030303		std dev	0.255051	0.362342	0.244719
preBötC f	0.248613	0.0925253	0.0235487			0.663378	0.675343			0.156522	0.0909091
	0.176398	0.0861001	0.00947557			0.498307	0.577607			0.103448	0		preBötC f	0.195734	0.0867844	0.00872465
	0.210262	0.114208	0.0877729			0.535468	0.83478			0.102564	0			0.279635	0.145616	0.0716081
	0.187492	0.179228	0.121718											0.116721	0.0770158	0.0238788
	0.183567	0.101809	0.0632793		average	0.63163	0.954887		average	0.150367	0.065053			0.260886		0.0356189
	0.294973	0.177777	0.110677		std dev	0.0616724	0.429062		std dev	0.138432	0.0653444			0.366419	0.248483	0.0301201
														0.0770957		0.0177138
average	0.216885	0.125275	0.0694119		XII amp	0.56691	0.557432		preBötC f	0.348227	0.0239055			0.293922	0.250954	0.112369
std dev	0.046393	0.042303	0.045846			0.713942	0.644263			0.254661	0.0653888
						0.6529	0.842047			0.198795	0.071793		average	0.227202	0.161771	0.0428619
						0.713127	0.72197			0.226301	0.0341672		std dev	0.102831	0.0844688	0.0365845
						0.625843	0.981543			0.1554	0.0519064
						0.726442	0.802587			0.23309	0.0186238
						0.584173	0.824504			0.160155	0.0253637
						0.696399	0.71967			0.402099	0.01567
						0.611236	0.817218			0.203123	0.00671691
						0.772287	0.963723			0.152662	0.079828
						0.705125	0.240131			0.273894	0.0479796
						0.586477	0.267874			0.197887	0.0302599
						0.742048	0.907395			0.182528	0.0352613
					average	0.668993	0.714643		average	0.229909	0.0389895
					std dev	0.0678311	0.236555		std dev	0.0750328	0.0227579

## Sheet: Figure 2
Figure 2B					Figure 2D						Figure 2E
	3/1	6-25 uM Cd2+	6-25 uM Cd2++1-10 nM DAMGO			9/1.5	30 nM DAMGO	100 nM DAMGO	200 nM DAMGO			9/1.5	DAMGO
burstlet fraction	0.834783	0.863309	0.930693		stim-> burst	1		0			latency	0.0942383	0.167969
	0.102564	0.619048	1			0.85	0.2	0.1	0			0.130859	0.176953
	0.615385	0.735632	1			0.8	0.5	0				0.0847168	0.148071
	0.615385	0.793103	1			0.89		0.89	0			0.0841064	0.121948
	0.428571	0.538462	0.977273			0.8	0.8	0.7	0			0.133301	0.170898
	0.5	0.779661	1			0.8	0.4	0.1	0
	0.125	1	1
	0.111111	0.9	0.666667		average	0.856667	0.475	0.298333	0		average	0.105444	0.157168
					std dev	0.0791623	0.25	0.39194	0		std dev	0.0246598	0.0224712
average	0.4166	0.778652	0.946829
std dev	0.277226	0.149338	0.115767
preBötC f	0.384902	0.463225	0.335804
	0.132923	0.313709	0.122207
	0.266131	0.312426	0.219425
	0.320406	0.234335	0.177813
	0.251742	0.193804	0.155307
	0.270151	0.192012	0.160456
	0.250503	0.278184	0.155637
	0.231609	0.232708	0.117116
average	0.263546	0.277551	0.180471
std dev	0.0721136	0.0888079	0.070419
burstlet amp	0.412586	0.432952	0.281455
	0.447521	0.188069	0.124945
	0.416896	0.427796	0.361367
	0.459185	0.338948	0.308399
	0.401798	0.40715	0.35777
	0.402905	0.397155	0.323677
	0.402496	0.332082	0.269554
	0.648849	0.242337	0.222167
average	0.449029	0.345811	0.281167
std dev	0.0835956	0.0898721	0.0782579

## Sheet: Figure 3
Figure 3J
	Dbx1+/+;Oprm1fl/fl			Dbx1cre;Oprm1fl/fl
	9/1.5	30 nM DAMGO		9/1.5	30 nM DAMGO
preBötC f	0.0313283	0.0161697		0.277504	0.34274
	0.0860813	0.0117066		0.306055	0.421074
	0.0948723	0.014293		0.245012	0.281227
	0.152538	0.00498216		0.325979	0.25211
	0.230705	0.0134204		0.321592	0.416213
	0.206473	0.004227		0.119157	0.168888
				0.128824	0.137324
				0.211125	0.206336
				0.259378	0.234306
average	0.133666	0.0107998		0.243847	0.273357
std dev	0.0765712	0.00501547		0.0773657	0.101852

## Sheet: Figure 4
Figure 4B						Figure 4D				Figure 4F
	9/1.5+30 nM DAMGO	9/1.5+100 uM picrotoxin+1 uM strychnine+30 nM DAMGO	3/1+30 nM DAMGO	3/1+500 nM SP+30 nM DAMGO			3/1	3/1+500 nM SP			3/1	3/1+100 uM picrotoxin+1 uM strychnine
norm. burstlet fraction	0	0.449923	1.19595	0.371429		burstlet fraction	0.471154	0.0705882		XII amp	0.771085	1.01851
	0	1.17582	1.00791	0.236923			0.844156	0.333333			0.121058	0.838913
	0.807692	0.933333	2.38636				0	0.0340909			0.854325	2.64756
	1.44598	0.212054	0.378378	0.252772			0.289474	0.0721649			0.683663	1.84772
	0.736842	0.722222	0.889968	0.412218			0.542636	0.0674157			0.753561	2.27574
	0.862745	0	0.888889	0.0811966			0.684211	0			0.872179	0.970001
			1.03571								0.879121	0.92729
		0.338028				average	0.471938	0.0962655			0.751531	1.57678
		1				std dev	0.298202	0.119504			0.793569	2.84782
		1.90909									0.694606	3.26155
		0.580808				preBötC f	0.346766	0.28094			0.828166	0.745232
		1.27692					0.259967	0.353245			0.778796	1.03041
		0.844445					0.175181	0.29187			0.829084	1.14148
							0.121295	0.324171
average	0.64221	0.786888	1.11188	0.270908			0.429472	0.296934		average	0.739288	1.62531
std dev	0.557834	0.52503	0.617115	0.129949			0.132146	0.194285		std dev	0.1957	0.863979
norm. preBötC f	0.0947203	0.0686492	0.044574	0.388392		average	0.244138	0.290241		preBötC burst amp	0.151797	0.132368
	0.0537169	0.256768	0.256077	0.702416		std dev	0.124514	0.0537816			0.741665	1.03063
	0.417445	0.361141	0.20458	1.22404							0.895918	1.04885
	0.649191	0.150981	0.136531	1.11821							0.707959	0.741885
	0.34472	0.334017	0.0822013	0.603735							0.80788	1.23855
	0.375209	0.0798995	0.229763	0.907709							0.710748	0.68325
		0.15837	0.38231								0.73331	0.737898
		0.0389705									0.924255	1.34548
		0.0330681									0.582885	0.842352
		0.522907									0.815967	0.887652
		0.175176									0.696159	0.879056
		0.152915									0.789473	0.841333
		0.193183									0.691775	1.23592
average	0.3225	0.194311	0.190862	0.824082						average	0.711523	0.895787
std dev	0.220518	0.142445	0.114576	0.318323						std dev	0.190917	0.310883
										burstlet fraction	0.265306	0.215686
											0.315789	0.0212766
											0.851852	0.272727
											0.470588	0.402597
											0.804878	0
											0.212121	0.0461538
											0.72	0.125
											0.926554	0
											0.288889	0.047619
											0.580645	0.128713
											0.444444	0.0816327
											0.652174	0.1875
											0.152542	0.0714286
										average	0.514291	0.123103
										std dev	0.260646	0.119004
										preBötC f	0.162625	0.16875
											0.121539	0.159763
											0.0907978	0.260041
											0.114451	0.256653
											0.135441	0.221442
											0.220621	0.217499
											0.165962	0.105435
											0.592629	0.284972
											0.150647	0.211477
											0.0978097	0.252829
											0.267169	0.162575
											0.310888	0.211244
											0.195863	0.182936
										average	0.202034	0.207355
										std dev	0.134275	0.0503127
