# Supplementary material for: Opioids modulate an emergent rhythmogenic process to depress breathing
Source: eLife journal article supplement (doi:10.7554/elife.50613), 2019-12-16
Supplement: supp [file elife-50613-supp-v1.zip]

Archive with 3 entries (3 files):
- elife_poa_e50613_Supplementary_file_1.pdf
- elife_poa_e50613_Transparent_Reporting_File.docx
- elife_poa_e50613_Figure_3_figure_supplement_1.pdf
