# Supplementary material for: Opioids modulate an emergent rhythmogenic process to depress breathing
Source: eLife journal article supplement (doi:10.7554/elife.50613), 2019-12-16
Supplement: supp [file elife-50613-supp-v1.zip › elife_poa_e50613_Supplementary_file_1.pdf]

**Supplementary file 1. Correlation of burst and burstlet parameters and preBötC  $f$ .**

| Comparison                                                     | Condition                                                   | $r^2$   | p-value | n  |
|----------------------------------------------------------------|-------------------------------------------------------------|---------|---------|----|
| burstlet fraction vs. preBötC $f$<br>(Related to Figure 1A-C)  | 9/1.5                                                       | 0.0026  | 0.5     | 6  |
|                                                                | 10 nM DAMGO                                                 | 0.26    | 0.1     | 6  |
|                                                                | 30 nM DAMGO                                                 | 0.031   | 0.4     | 6  |
|                                                                | Change in correlation                                       |         | 0.8     | 6  |
| burstlet fraction vs. preBötC $f$<br>(Related to Figure 1D-F)  | 30 nM DAMGO+<br>100 $\mu$ M picrotoxin/1 $\mu$ M strychnine | 0.00002 | 0.5     | 13 |
| preBötC burst amp. vs. preBötC $f$<br>(Related to Figure 1D-F) | 30 nM DAMGO+<br>100 $\mu$ M picrotoxin/1 $\mu$ M strychnine | 0.1     | 0.1     | 13 |
| burstlet fraction vs. preBötC $f$<br>(Related to Figure 1G-I)  | 3/1                                                         | 0.21    | 0.1     | 7  |
|                                                                | 10 nM DAMGO                                                 | 0.38    | 0.1     | 7  |
|                                                                | 30 nM DAMGO                                                 | 0.0022  | 0.5     | 7  |
|                                                                | Change in correlation                                       |         | 0.6     | 7  |
| burstlet fraction vs. preBötC $f$<br>(Related to Figure 2A, B) | 3/1*                                                        | 0.71    | 0.005   | 8  |
|                                                                | $\text{Cd}^{2+}$                                            | 0.059   | 0.3     | 8  |
|                                                                | $\text{Cd}^{2+}$ +DAMGO                                     | 0.037   | 0.3     | 8  |
|                                                                | Change in correlation                                       |         | 0.9     | 8  |
| burstlet fraction vs. preBötC $f$<br>(Related to Figure 4C, D) | 3/1                                                         | 0.073   | 0.3     | 6  |
|                                                                | 500 nM SP                                                   | 0.53    | 0.05    | 6  |
|                                                                | Change in correlation                                       |         | 0.3     | 6  |
| burstlet fraction vs. preBötC $f$<br>(Related to Figure 4E, F) | 3/1                                                         | 0.11    | 0.1     | 13 |
|                                                                | 100 $\mu$ M picrotoxin/1 $\mu$ M strychnine                 | 0.04    | 0.3     | 13 |
|                                                                | Change in correlation                                       |         | 0.1     | 13 |

\*,  $p < 0.05$
