# Supplementary figures and images for: Opioids modulate an emergent rhythmogenic process to depress breathing
Source: eLife journal article supplement (doi:10.7554/elife.50613), 2019-12-16

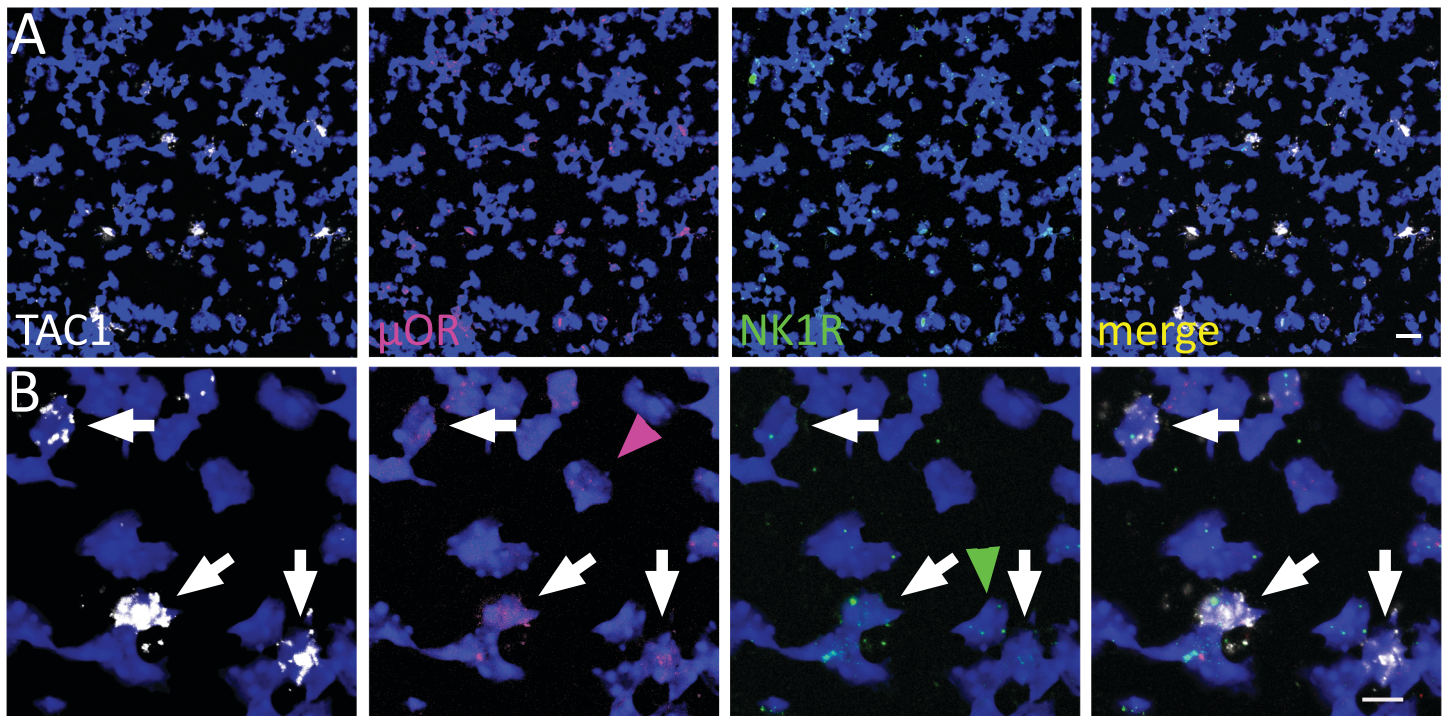

**C**

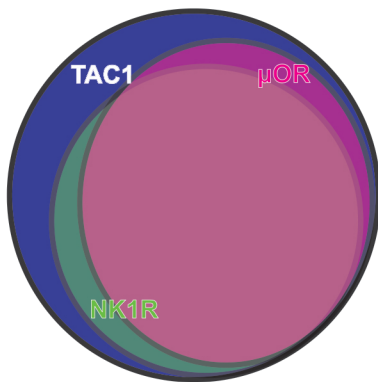

TAC1 = 284 neurons  
TAC1 +  $\mu$ OR = 268 neurons  
TAC1 + NK1R = 265 neurons  
TAC1 +  $\mu$ OR + NK1R = 260 neurons

Figure 3 - figure supplement 1

Supplement: supp [file elife-50613-supp-v1.zip › elife_poa_e50613_Figure_3_figure_supplement_1.pdf]
